# Supplementary material for: Fabrication of ZnO Ceramics with Defects by Spark Plasma Sintering Method and Investigations of Their Photoelectrochemical Properties
Source: MDPI journal article supplement (doi:10.3390/nano11102506), 2021-09-26
Supplement: s1 [file s1]

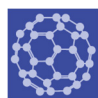

# Supplementary Materials

## Fabrication of ZnO Ceramics with Defects by Spark Plasma Sintering Method and Investigations of Their Photoelectrochemical Properties

Liren Zheng <sup>1,2</sup>, Mu Liu <sup>1</sup>, Haipeng Zhang <sup>1</sup>, Zhaoke Zheng <sup>1</sup>, Zeyan Wang <sup>1,\*</sup>, Hefeng Cheng <sup>1</sup>, Peng Wang <sup>1</sup>, Yuanyuan Liu <sup>1</sup> and Baibiao Huang <sup>1,\*</sup>

<sup>1</sup> State Key Laboratory of Crystal Materials, Shandong University, Jinan 250100, China; 201720279@mail.sdu.edu.cn (L.Z.); liumu@mail.sdu.edu.cn (M.L.); 201820321@mail.sdu.edu.cn (H.Z.); zkzheng@sdu.edu.cn (Z.Z.); chenghefeng@sdu.edu.cn (H.C.); pengwangicm@sdu.edu.cn (P.W.); yylliu@sdu.edu.cn (Y.L.)

<sup>2</sup> School of Physics and Electronic Engineering, Taishan University, Tai'an 271000, China

\* Correspondence Email: wangzeyan@sdu.edu.cn (Z.W.); bbhuang@sdu.edu.cn (B.H.)

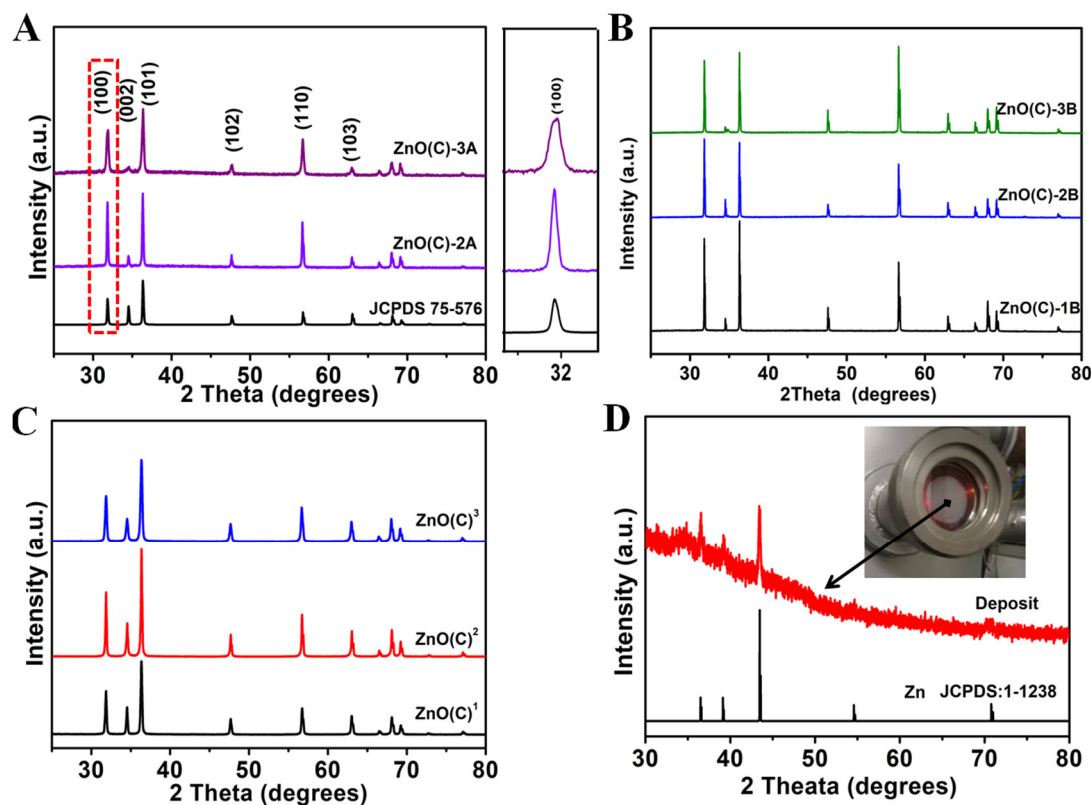

**Figure S1.** (A) XRD patterns of the ZnO(C)-2A (3A) samples; (B) XRD patterns of the ZnO(C)-1B (2B and 3B) samples; (C) XRD patterns of the ZnO(C)<sup>1</sup>, ZnO(C)<sup>2</sup> and ZnO(C)<sup>3</sup> samples; (D) XRD of the deposits on the inner surface of quartz sheet. insert: digital photograph of the observation window of a vacuum furnace with silver-gray zinc deposited on the inner surface of the quartz glass.

**Table S1.** The quality changes of the three samples after 1h treatment in 1100 °C vacuum condition.

|        | ZnO(C)-1 | ZnO(C)-2 | ZnO(C)-3 |
|--------|----------|----------|----------|
| before | 39.2 mg  | 44.7 mg  | 45.5 mg  |
| after  | 28.5 mg  | 35.3 mg  | 36.1 mg  |

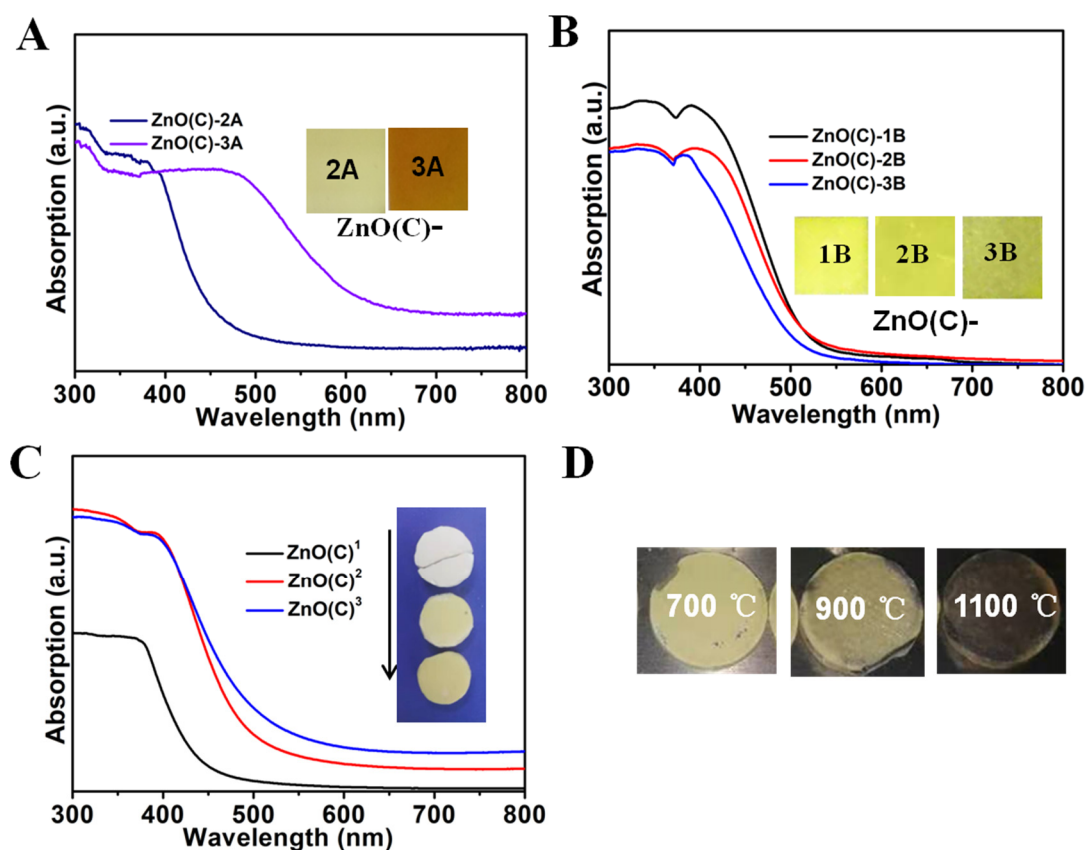

**Figure S2.** (A) UV-Vis DRS of the ZnO(C)-2A (3A) samples, insert: the digital photographs of ZnO(C)-2A (3A); (B) UV-Vis DRS of the ZnO(C)-1B (2B and 3B) samples, insert: the digital photographs of ZnO(C)-1B (2B and 3B); (C) UV-Vis DRS of the ZnO(C)<sup>1</sup>, ZnO(C)<sup>2</sup> and ZnO(C)<sup>3</sup> samples, insert: the digital photographs of the three samples; (D) The digital photographs of three ceramics prepared at different temperatures, with graphite paper around them cleaned with sandpaper.

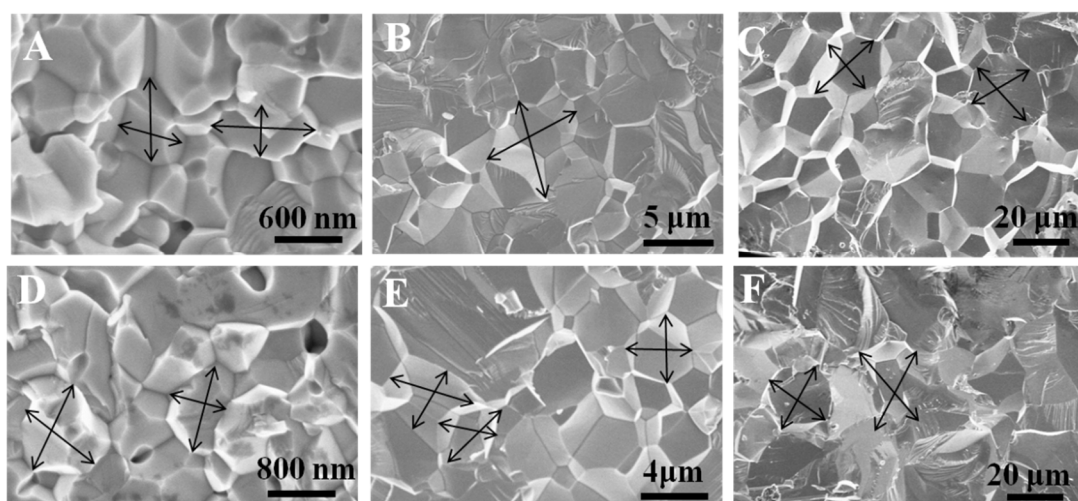

**Figure S3.** SEM images of the ceramics obtained at different temperature and the ceramics annealed at 500 °C for 5 h in ambient, (A) ZnO(C)-1, (B) ZnO(C)-2, (C) ZnO(C)-3, (D) ZnO(C)-1A, (E) ZnO(C)-2A and (F) ZnO(C)-3A. Insert: the “ $\longleftrightarrow$ ” represents the auxiliary line for grain size measurement.

**Table S2.** The density ( $\rho$ ) and relative density of the ZnO powder and ceramics prepared at 700 °C, 900 °C and 1100 °C.

| Temperature                  | 700 °C                      |                      | 900 °C                      |                      | 1100 °C                     |                      |
|------------------------------|-----------------------------|----------------------|-----------------------------|----------------------|-----------------------------|----------------------|
| Density and Relative density | $\rho$ (g/cm <sup>3</sup> ) | Relative density (%) | $\rho$ (g/cm <sup>3</sup> ) | Relative density (%) | $\rho$ (g/cm <sup>3</sup> ) | Relative density (%) |
| SPS method                   | 5.54                        | 98.1                 | 5.65                        | 99.6                 | 5.70                        | 100                  |
| Traditional sintering method | 4.90                        | 86.7                 | 5.60                        | 99.1                 | 5.65                        | 99.6                 |

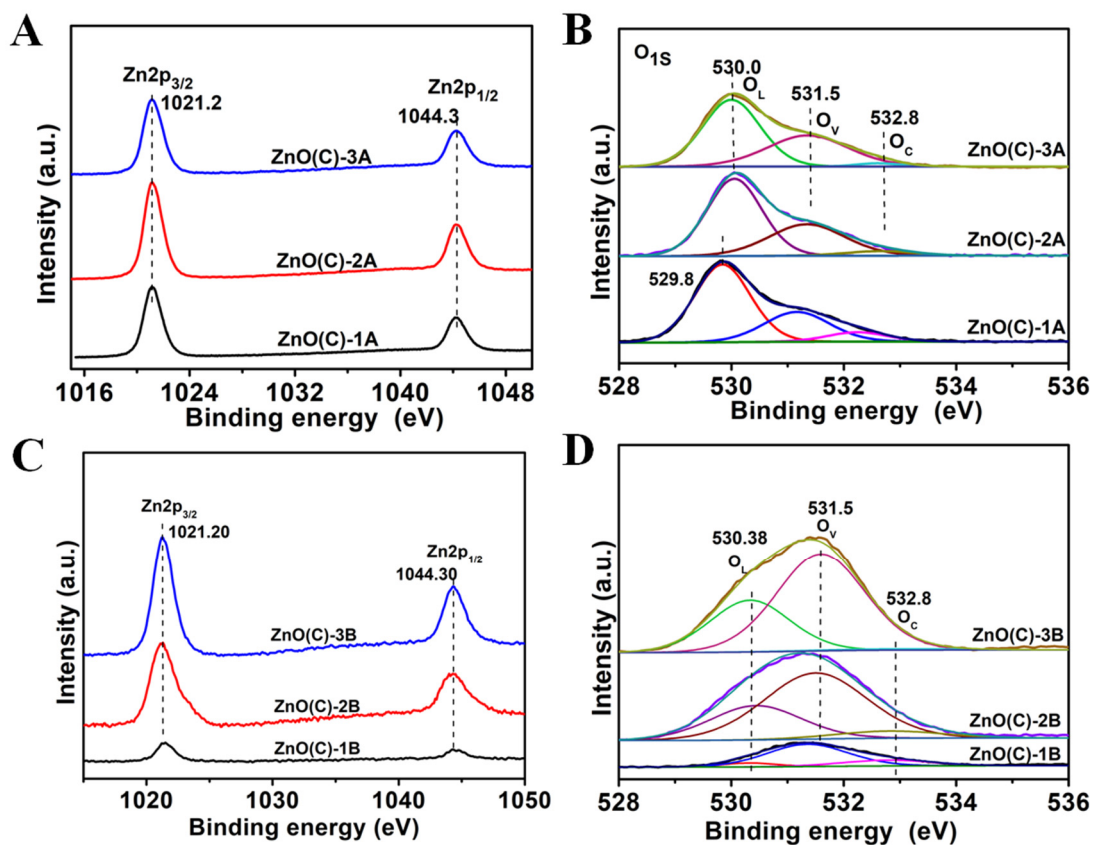**Figure S4.** XPS patterns of the ZnO powder and ZnO(C)-1A (2A and 3A), (A) Zn 2p peak and (B) O1s peak; XPS patterns of the ZnO(C)-1B (2B and 3B), (C) Zn 2p peak and (D) O1s peak.

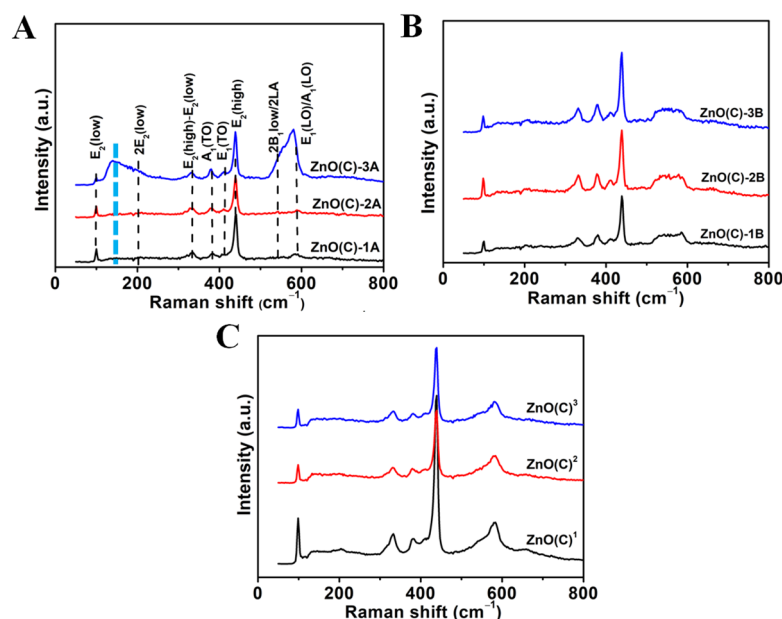

**Figure S5.** (A) Raman spectrum of ZnO(C)-1A (2A and 3A) samples; (B) Raman spectrum of ZnO(C)-1B (2B and 3B) samples; (C) Raman spectrum of ZnO(C)<sup>1</sup>, ZnO(C)<sup>2</sup> and ZnO(C)<sup>3</sup> samples.

**Table S3.** The resistivity mobility and density results of ZnO(C)-1, ZnO(C)-2 and ZnO(C)-3.

|                                        | ZnO(C)-1              | ZnO(C)-2              | ZnO(C)-3              |
|----------------------------------------|-----------------------|-----------------------|-----------------------|
| Resistivity ( $\Omega\cdot\text{cm}$ ) | 1187.52               | 0.1435                | 0.0561                |
| Mobility ( $\text{cm}^2/\text{Vs}$ )   | 7.94                  | 26.63                 | 38.94                 |
| Density ( $\text{cm}^{-3}$ )           | $6.65 \times 10^{14}$ | $1.63 \times 10^{18}$ | $2.86 \times 10^{18}$ |

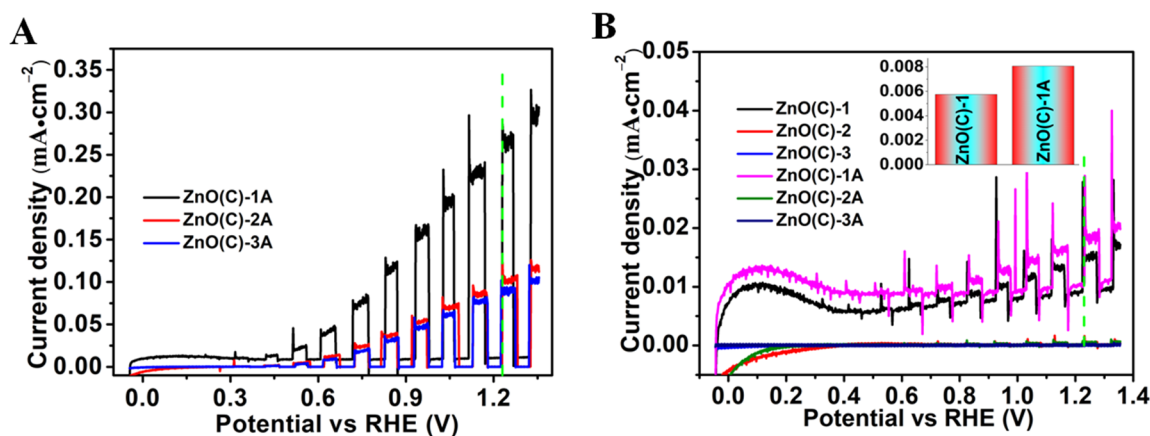

**Figure S6.** (A) Photocurrent density versus applied potential (J-V) curves measured for the ZnO(C)-1A (2A and 3A) photoanodes with a scan rate of 20 mV/s under AM 1.5G illumination or visible light irradiation in 0.1 M NaSO<sub>4</sub> solution (PH = 6.8) and (B) Photocurrent density versus applied potential (J-V) curves measured for the ZnO(C)-1 (2 and 3) and ZnO(C)-1A (2A and 3A) photoanodes with a scan rate of 20 mV/s under visible light irradiation by 300W Xe arc lamp equipped with a UV/IR cut filter ( $\lambda \geq 420$  nm) inset, the photocurrent values at 1.23 V<sub>RHE</sub>.

**Table S4.** Photocurrents ( $I_{1.5}$  and  $I_v$ ) of ZnO(C)-1(1A) under the AM 1.5G illumination and visible light at 1.23 V<sub>RHE</sub>.

|           | $I_{1.5}$ (mA/cm <sup>2</sup> ) | $I_v$ (mA/cm <sup>2</sup> ) | $I_v/I_{1.5}$ |
|-----------|---------------------------------|-----------------------------|---------------|
| ZnO(C)-1  | 0.14                            | 0.005                       | 3.6 %         |
| ZnO(C)-1A | 0.27                            | 0.008                       | 2.9 %         |
